# Supplementary material for: Aging exacerbates the brain inflammatory micro-environment contributing to α-synuclein pathology and functional deficits a mouse model of DLB/PD
Source: Research Square preprint supplement (doi:10.21203/rs.3.rs-211252/v1), 2021-02-19
Supplement: Supplementary file 1 [file 5bd1f55de16b4e3b9a4a4942.docx]

**Supplemental Information**

**Aging exacerbates the brain inflammatory micro-environment contributing to -synuclein pathology and functional deficits a mouse model of DLB/PD**

Michiyo Iba, Ross McDevitt, Changyoun Kim, Roshni Roy, Dimitira Sarantoupoulou, Ella Tommer, Somin Kwon, Byron Siegars, Michelle Sallin, Jyoti Misra Sen, Ranjan Sen, and Eliezer Masliah

**
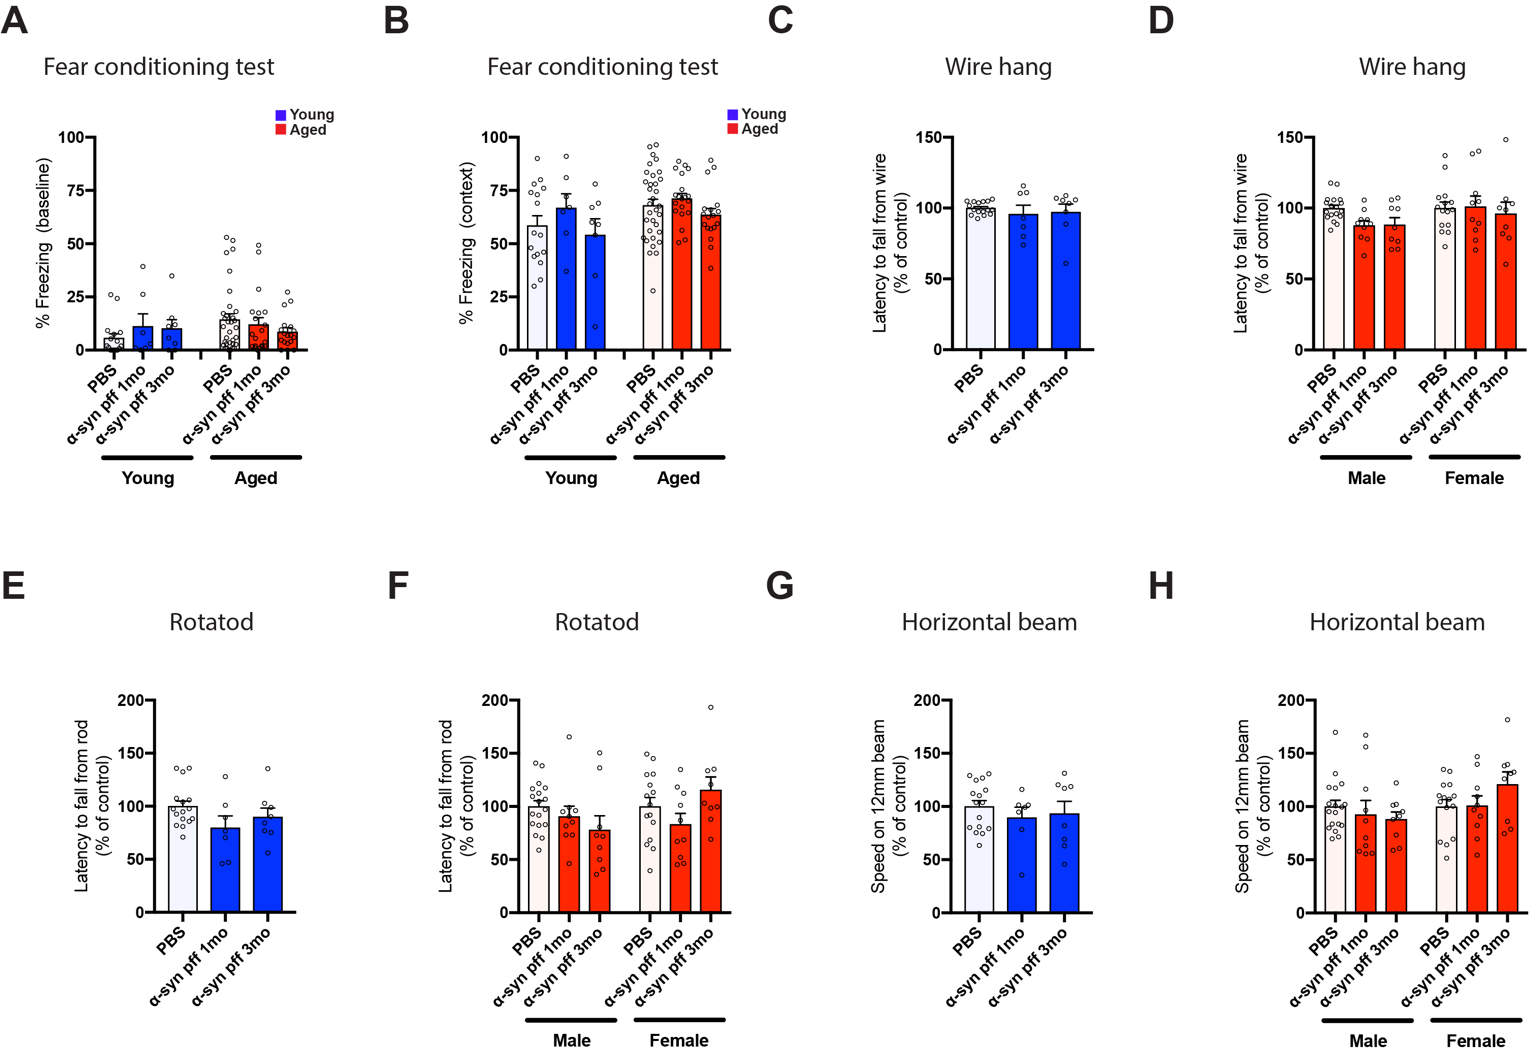
**

**Figure S1**. **Additional behavioral and locomotor activity analysis in young and aged wt mice at 1- and 3-momth post-injection with PBS or ɑ-syn pff**. (**A**) Baseline freezing rate (%) in the fear conditioning test. (**B**) Freezing rate during the context period (%) in the fear conditioning test. (**C**) Latency to fall from wire shown in % of control in young and (**D**) aged mouse cohorts. (**E**) Latency to fall from rotarod in % control in young and (**F**) aged mouse cohorts. (**G**) Speed on 12 mm horizontal beam in % control in young and (**H**) aged mouse cohorts.

**
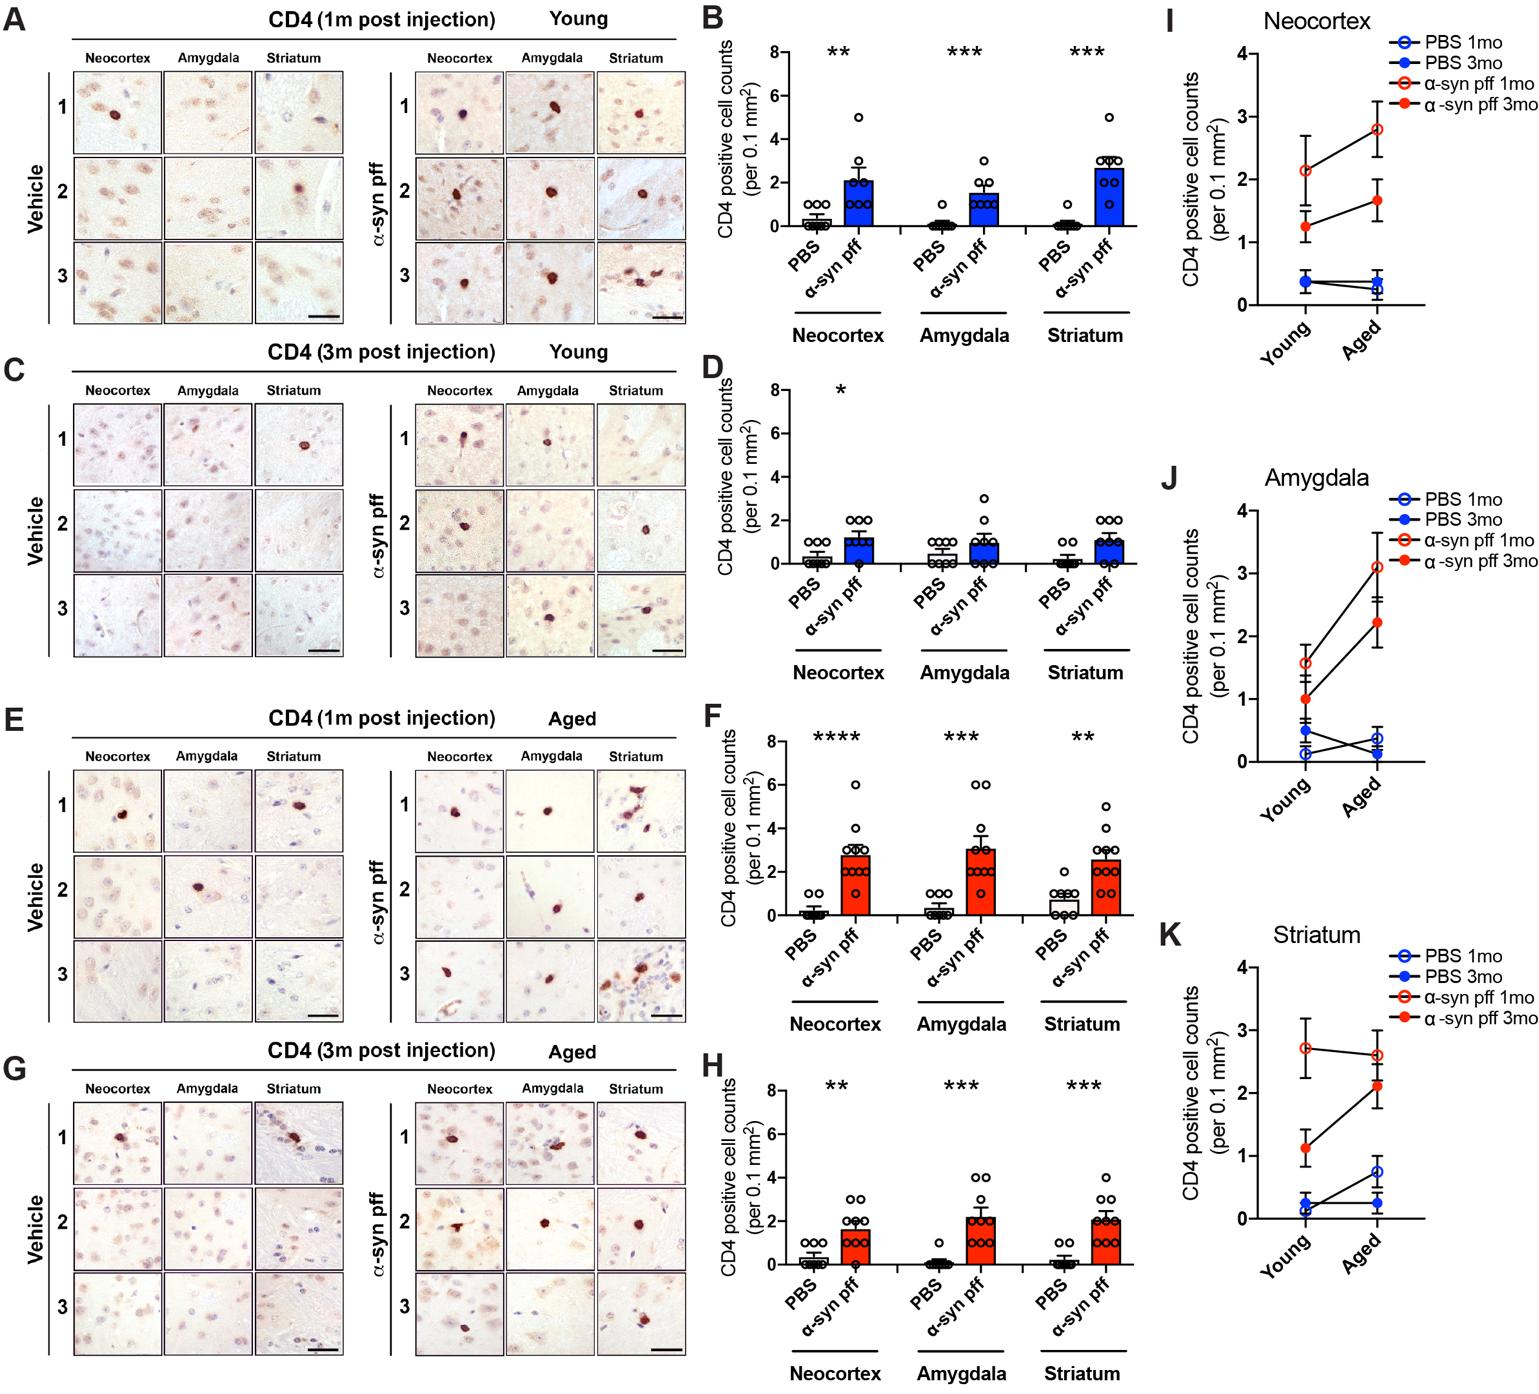
**

**Figure S2**. **Immunohistochemical analysis of helper T cells with the CD4 antibody in young and aged wt mice at 1- and 3-month post-injection with ɑ-syn pff**. (**A**) Representative images for CD4 immunostaining of young mouse cohort at 1-month post injection. Images are from three different mice (1, 2 and 3) of three brain regions (cortex, amygdala, and striatum). Left panels are PBS (vehicle) injected and right are ɑ-syn pff injected. (**B**) Image analysis of CD4 positive cell counts per 0.1mm2 of young mouse cohort at 1-month post injection. (**C**) CD4 immunostaining of young mouse cohort at 3-month post injection. Same format as **A**. (**D**) Image analysis of CD4 positive cell counts per 0.1mm2 of young mouse cohort at 3-month post injection. (**E**) CD4 immunostaining of aged mouse cohort at 1-month post injection. Same format as **A.** (**F**) Image analysis of CD4 positive cell counts per 0.1mm2 of aged mouse cohort at 1-month post injection. (**G**) CD4 immunostaining of aged mouse cohort at 3-month post injection. Same format as **A.** (**H**)Image analysis of CD4 positive cell counts per 0.1mm2 of aged mouse cohort at 3-month post injection. (**I-K**) Comparison of image analysis of CD4 positive cell counts per 0.1mm2 in cortex (**I**), amygdala (**J**) and amygdala (**K**) of ɑ-syn pff injected mice at 1- and 3-month post-injection in young (blue) and old (red) mouse cohorts. Scale bar is 40 μm. **p* < 0.05; ***p* < 0.01; ****p* < 0.001; *****p* < 0.0001.

**
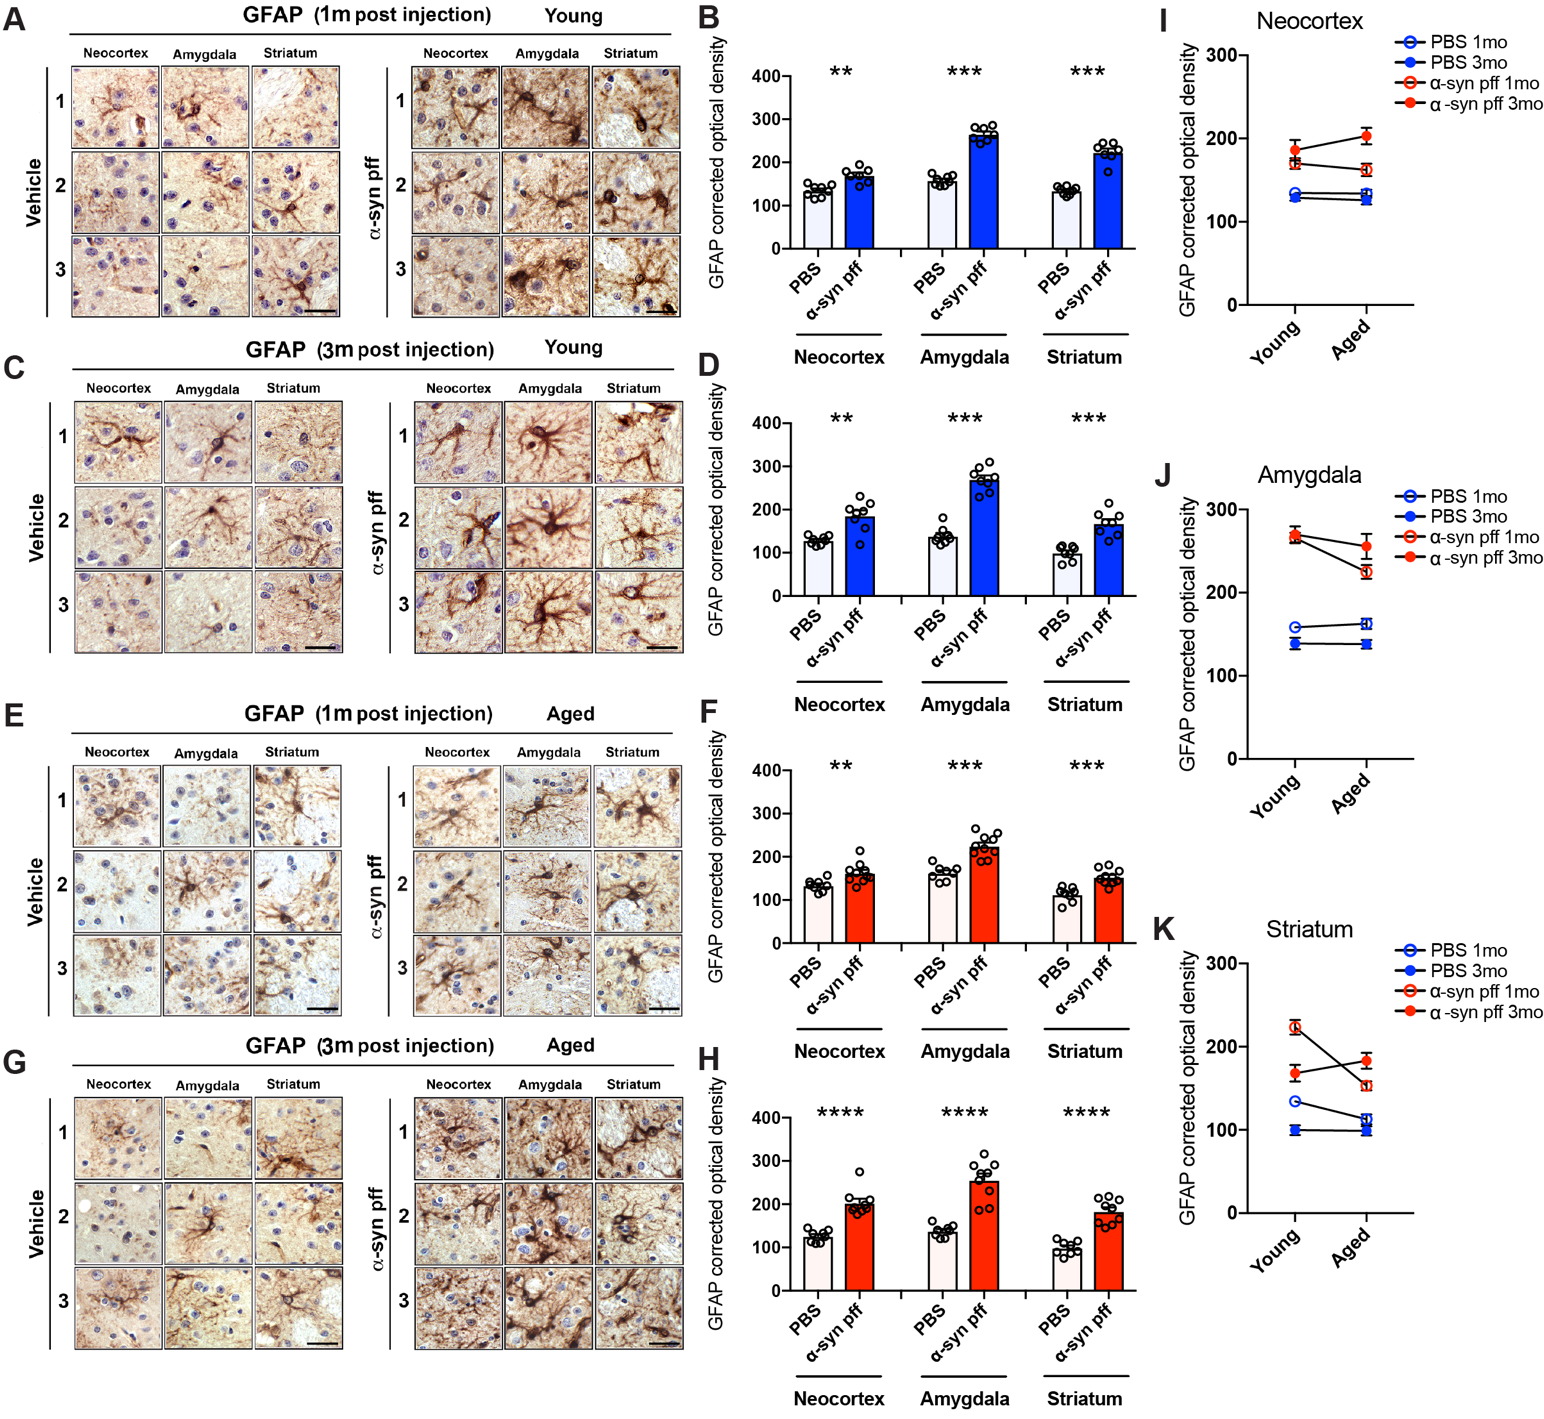
**

**Figure S3**. **Immunohistochemical analysis of astroglial cells with the GFAP antibody in young and aged wt mice at 1- and 3-month post-injection with PBS or ɑ-syn pff**. (**A**) Representative images for GFAP immunostaining of young mouse cohort at 1-month post injection. Images are from three different mice (1, 2 and 3) of three brain regions (cortex, amygdala, and striatum). Left panels are PBS (vehicle) injected and right are ɑ-syn pff injected. (**B**) Image analysis of GFAP positive cell counts per 0.1mm2 of young mouse cohort at 1-month post injection. (**C**) GFAP immunostaining of young mouse cohort at 3-month post injection. Same format as **A**. (**D**) Image analysis of GFAP positive cell counts per 0.1mm2 of young mouse cohort at 3-month post injection. (**E**) GFAP staining images of aged mouse cohort at 1-month post injection. Same format as **A.** (**F**) Image analysis of GFAP positive cell counts per 0.1mm2 of aged mouse cohort at 1-month post injection. (**G**) GFAP immunostaining of aged mouse cohort at 3-month post injection. Same format as **A.** (**H**)Image analysis of GFAP positive cell counts per 0.1mm2 of aged mouse cohort at 3-month post injection. (**I-K**) Comparison of image analysis of GFAP positive cell counts per 0.1mm2 in cortex (**I**), amygdala (**J**) and amygdala (**K**) of ɑ-syn pff injected mice at 1- and 3-month post-injection in young (blue) and aged (red) mouse cohorts. Scale bar is 20 μm. ***p* < 0.01; ****p* < 0.001; *****p* < 0.0001.

**
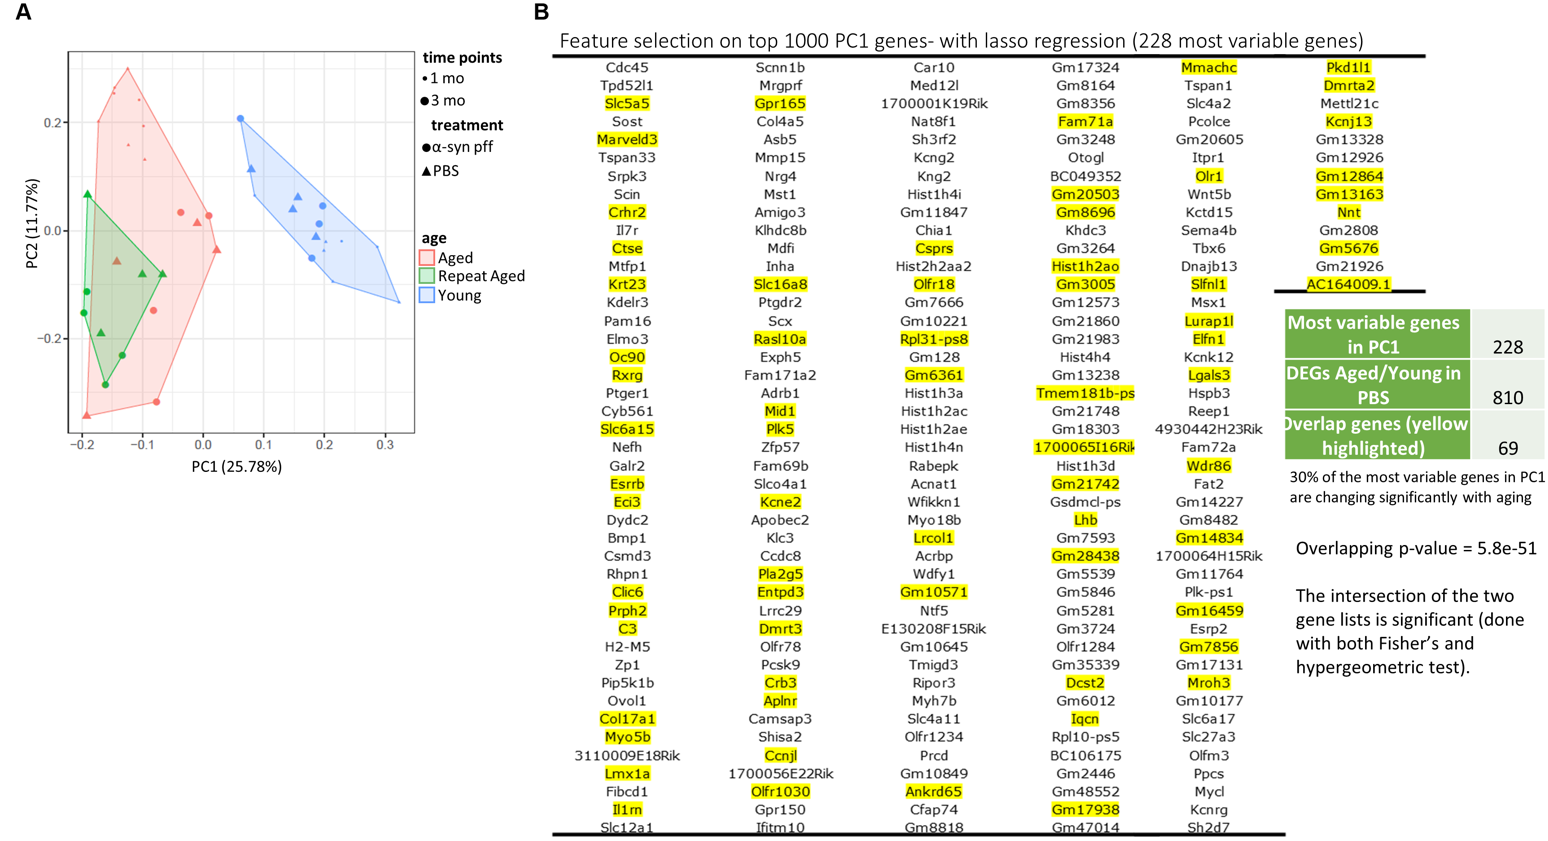
**

**Figure S4**. **Principal component (PC) analysis and feature selection of top 1000 PC1 genes.** (**A**) Principal component analysis of all the young (blue) and aged (red) microglia samples considered in the study. Data from a follow-up experiment on another set of aged mice (green) with similar 1-(smaller data point) and 3-months (larger data point) PBS (dot) and ɑ-syn pff (triangle) treatment has also been included. PC1 (25.78% contribution) separates the young from the aged mice indicating that it comprises of age-associated genes.(**B**) Using lasso regression method for feature selection, top 1000 PC1 genes were picked of which 228 most variable genes have been mentioned. The 69 highlighted genes are the ones that also change with age (>2-fold, p<0.05). Significance of overlap of 69 genes was confirmed by hypergeometric test.

**
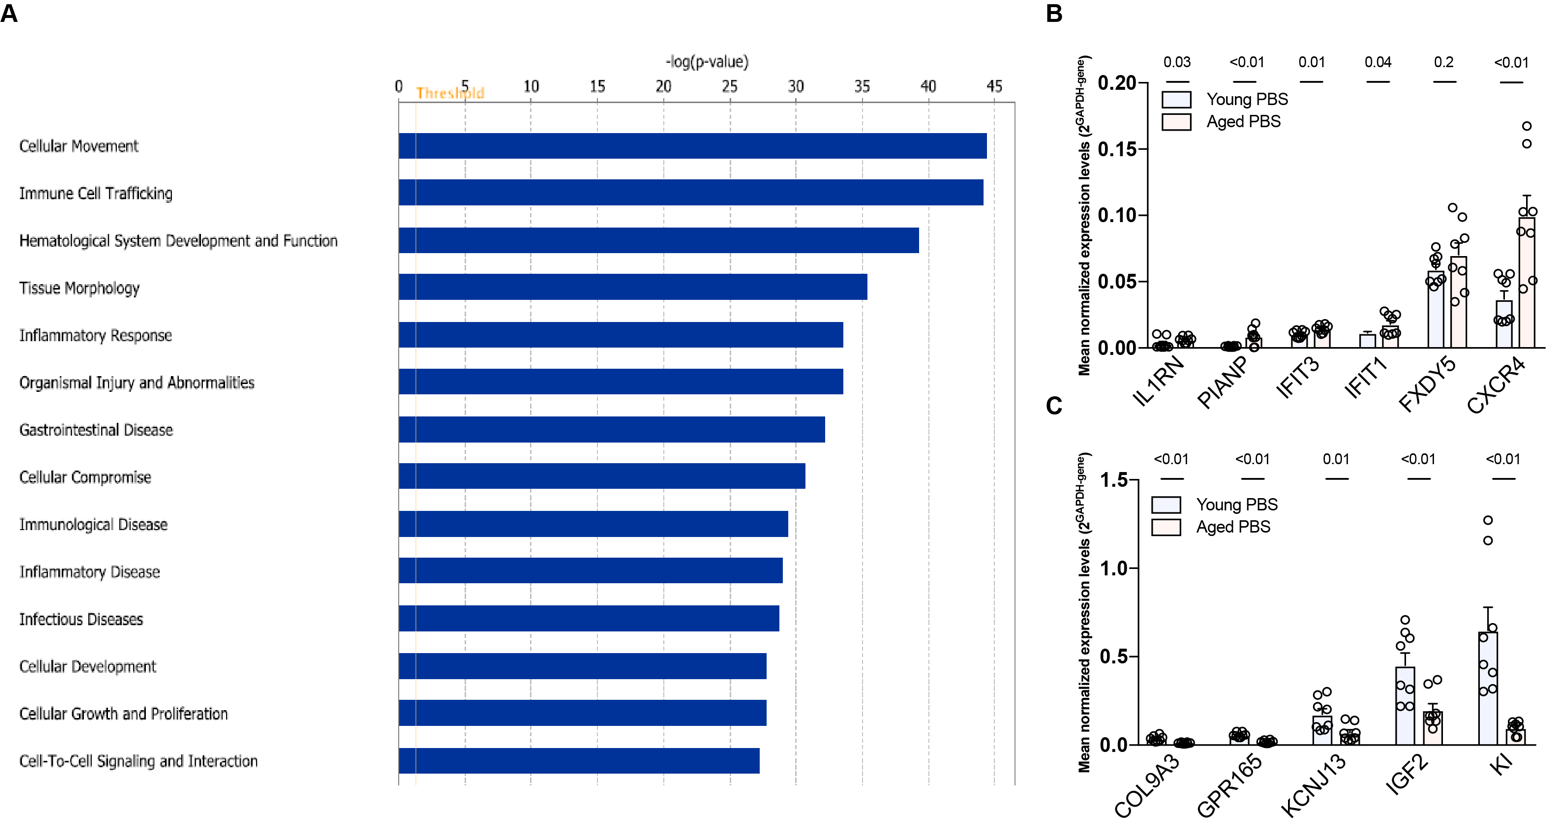
**

**Figure S5**. **Pathway analysis with functions and diseases along with qRT-PCR validation of age-associated genes. (A)** Top 14 functions and diseases associated with genes dysregulated with age.  **(B-C)** Few of genes up- or downregulated with age in old mice were validated by qPCR.The genes were run in duplicate in all PBS injected mice with sufficient RNA. The genes were normalized against *Gapdh*. The mean and the standard error are derived from combining all the 1- and 3-month PBS injected mice in each of the age groups. **(B)** Bar graph on the top shows the qPCR results of the genes that are upregulated with age in RNA-Seq (*Il1rn*, *Pianp*, *Ifit3*, *Fxdy5*, *Cxcr4*) need to change font in graphpad file. Gene names are in uppercase in the figures) (**C**)Bar graph on the bottom shows the qPCR results of the genes that are downregulated with age in RNA-Seq (*Col9a3*, *Gpr165*, *Kcnj13*, *Igf2* and *Ki*)

**
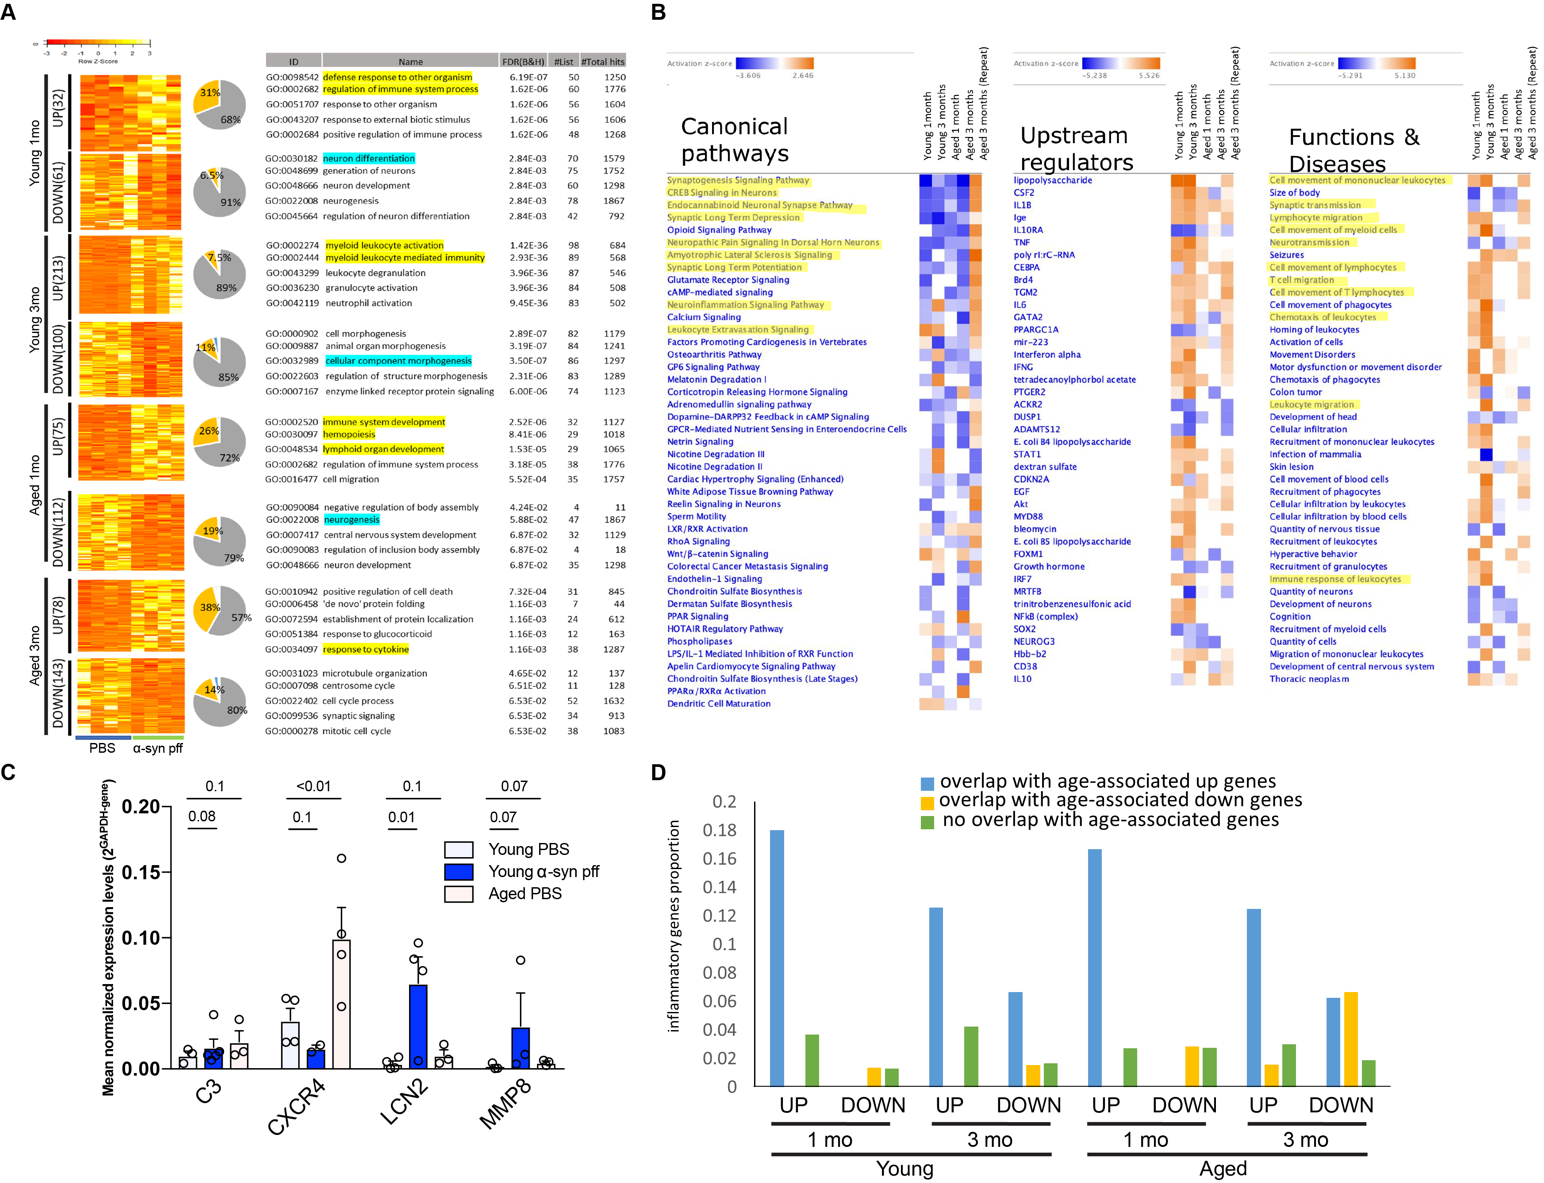
**

**Figure S6**. **Pathway and molecular characterization of genes associated with ɑ-syn pff treatment along with qPCR validation.** (**A**) DESeq2 identified a list of genes that were up- or downregulated by >2-fold with 1- or 3-months ɑ-syn pff injection in young and aged mice (p<0.05). Row Z-score calculated from TpM normalized counts have been used to construct the heatmaps of the DEGs across samples in both the PBS and ɑ-syn pff injection groups. The direction of deregulation is mentioned on the left of the heatmaps with the gene count in parenthesis. The pie-chart depicts the proportion of genes that were protein coding (yellow) vs non-protein coding (grey) in each group (percentage mentioned inside pie charts). The top 5 Gene ontology IDs (GO IDs) for each group were evaluated from ToppGene database and has been mentioned along with the name of the pathway and associated details (FDR p-value, number of DEGs in that pathway and total number of genes considered for the enrichment analyses). (**B**) ɑ-syn pff treatment associatedup- and downregulated genes (>1.5-fold, p<0.01) were processed through IPA to identify and compare the activation score of the top canonical pathways, upstream transcriptional regulators and functions and diseases across the different groups (young 1- and 3-months, aged 1- and 3-months). Top canonical pathways (left) are associated with neuronal system, neuroinflammation and leucocyte signaling (highlighted in yellow) which are uniformly repressed (blue) across the four groups. Most of the upstream transcriptional regulators of the DEGs behave uniformly across all the groups (center) and similar results are found for the functions and diseases (right).(**C**) Selected genes that went up with both age and ɑ-syn pfftreatment were validated by qRT-PCR (*C3*, *Cxcr4*, *Lcn2* and *Mmp8*) (p values from t-test mentioned above the bars). (**D**) In order to characterize the genes that got upregulated with both ɑ-syn pff treatment and aging in young as well as in aged mice, the genes were matched against inflammation-associated genes in mouse downloaded from MouseMine database. The bar graphs show the proportion of genes that are upregulated with ɑ-syn pff injection, are associated with inflammatory pathway and overlap with either age-associated upregulated genes (blue), age-associated downregulated genes (yellow) or no overlap with age-associated genes (green). The comparison was done for both 1- and 3-months treatment groups in both the age groups.

**
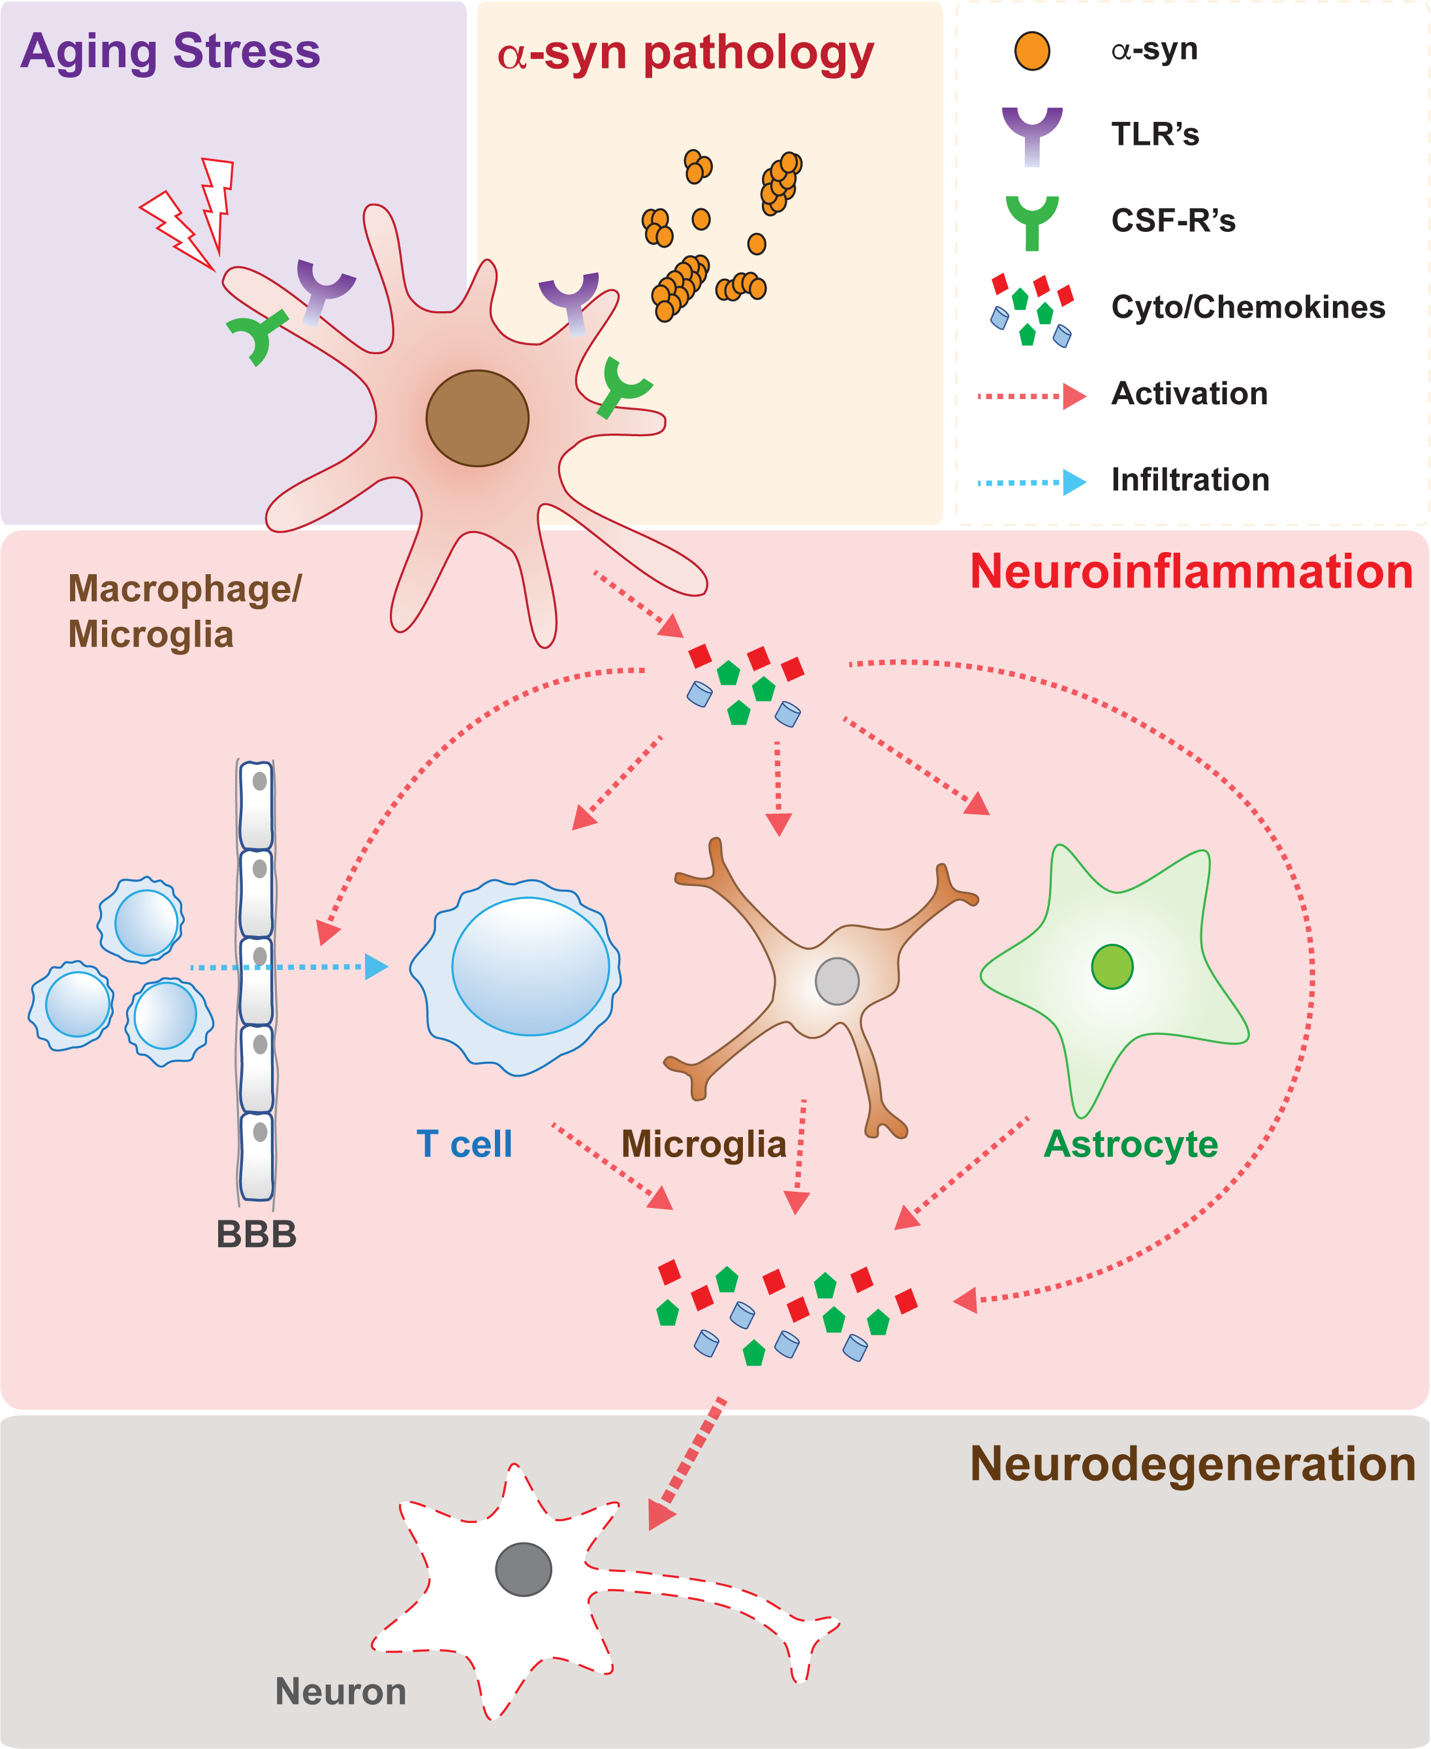
**

**Figure S7**. **Schematic depiction of the potential overlapping microglial networks and pathways that interact in aging and synucleinopathies**. The effects of aging processes and extracellular ɑ-syn convergence in the macrophages/microglia in the CNS probably by engaging both Toll-like receptors (TLR’s) such as TLR2 and colony stimulating factor receptors (CSF-R) that in turn activate pro-inflammatory LPS-like pathways with increased production of cytokines including TNFɑ, IL6, IL1ɑ and activation of networks involving CSF2. This in turn results in a cascade of events involving further activation of microglia, astrocytes and trafficking of T cells in to the CNS parenchyma that jointly produce pro-inflammatory neurotoxic factors leading to neurodegeneration.
